# Supplementary material for: Facile preparation of a V2O3/carbon fiber composite and its application for long-term performance lithium-ion batteries
Source: Royal Society of Chemistry journal article supplement (doi:10.1039/c7nj00320j), 2017-01-01
Supplement: c7nj00320j1.pdf [file c7nj00320j1.pdf]

## Supporting Information

# Facile preparation of V<sub>2</sub>O<sub>3</sub>/carbon fiber composite and its application for long-term performance lithium-ion batteries

Xinping Liu,<sup>a</sup> Renpin Liu,<sup>a</sup> Lingxing Zeng,<sup>\*a</sup> Xiaoxia Huang,<sup>a</sup> Xi Chen,<sup>a</sup> Cheng Zheng,<sup>b</sup> Yuxian Xu,<sup>a</sup> Qingrong Qian,<sup>a, c</sup> Mingdeng Wei,<sup>b</sup> and Qinghua Chen<sup>\*a, c</sup>

<sup>a</sup> Engineering Research Center of Polymer Green Recycling of Ministry of Education, Fujian Normal University, Fuzhou, Fujian 350007, China.

<sup>b</sup> Institute of Advanced Energy Materials, Fuzhou University, Fuzhou, Fujian 350002, China.

<sup>c</sup> Fujian Key Laboratory of Pollution Control & Resource Reuse, Fuzhou, Fujian 350007, China

E-mail: [zenglingxing@fjnu.edu.cn](mailto:zenglingxing@fjnu.edu.cn); [cqhuar@126.com](mailto:cqhuar@126.com); Tel: +86-591-83465156

**Table S1** Comparison of specific capacities and long-term cycling performances of the V<sub>2</sub>O<sub>3</sub>-based electrodes.

| materials                                                                   | specific capacity (mAh/g) | current density (A/g) | cycling numbers | ref      |
|-----------------------------------------------------------------------------|---------------------------|-----------------------|-----------------|----------|
| V <sub>2</sub> O <sub>3</sub> -based hybrid nanorods in aqueous electrolyte | 79                        | 0.18                  | 50 cycles       | S1       |
| V <sub>2</sub> O <sub>3</sub> @C composite                                  | 230                       | 5                     | 50 cycles       | S2       |
| V <sub>2</sub> O <sub>3</sub> -OMC                                          | 536                       | 0.1                   | 180 cycles      | S3       |
| V <sub>2</sub> O <sub>3</sub> /C NCs                                        | 780                       | 0.2                   | 100 cycles      | S4       |
| Yolk-Shell V <sub>2</sub> O <sub>3</sub> /C microsphere                     | 438                       | 0.1                   | 100 cycles      | S5       |
| V <sub>2</sub> O <sub>3</sub> /C composite                                  | ~750                      | 0.25                  | 50 cycles       | S6       |
| crystalline V <sub>2</sub> O <sub>3</sub> microspheres                      | 245                       | 2                     | 9000 cycles     | S7       |
| V <sub>2</sub> O <sub>3</sub> -rGO                                          | 350                       | 1.86                  | 1000 cycles     | S8       |
| V <sub>2</sub> O <sub>3</sub> @C micro/nanostructures                       | 333                       | 2                     | 200 cycles      | S9       |
| V <sub>2</sub> O <sub>3</sub> -CNFs                                         | 543                       | 0.5                   | 500 cycles      | our work |
| V <sub>2</sub> O <sub>3</sub> -CNFs                                         | 203                       | 4                     | 1000 cycles     | our work |

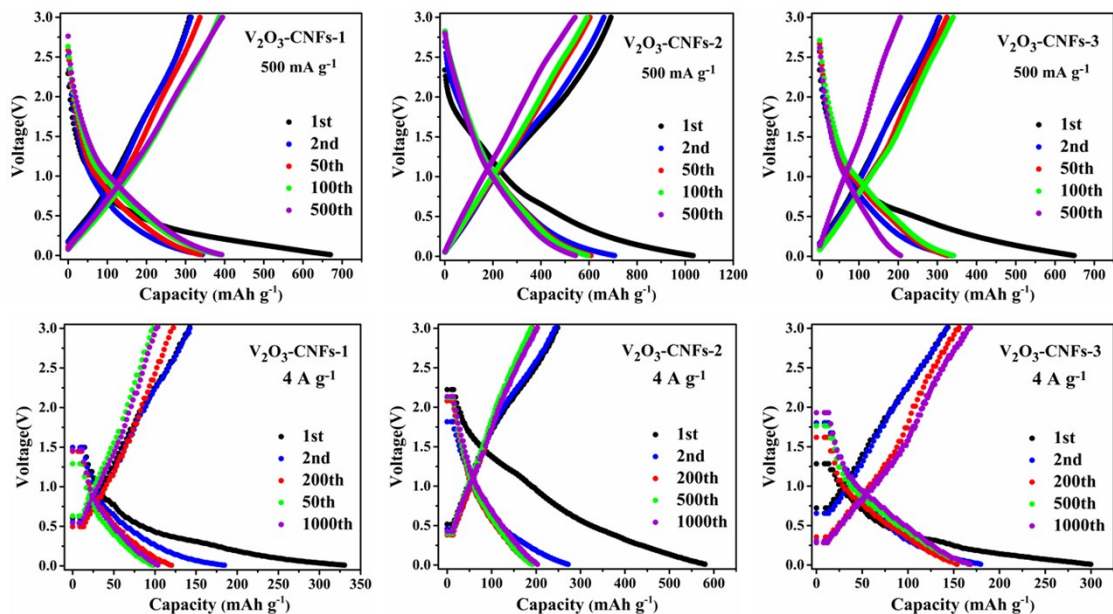

**Fig. S1** Galvanostatic charge/discharge curves of  $V_2O_3/CNFs$  at a cycling rate of  $0.5 \text{ A g}^{-1}$  and  $4 \text{ A g}^{-1}$ .

Refs:

- [S1] Y. F. Sun, S. S. Jiang, W. T. Bi, C. Z. Wu and Y. Xie, *J. Power Sources*, 2011, 196, 8644–8650.
- [S2] Y. Wang, H. J. Zhang, A. S. Admar, J. Z. Luo, C. C. Wong, A. Borgna and J. Y. Lin, *RSC Adv.*, 2012, 2, 5748–5753.
- [S3] L. X. Zeng, C. Zheng, J. C. Xi, H. L. Fei and M. D. Wei, *Carbon*, 2013, 62, 382–388.
- [S4] Y. Dong, R. Ma, M. Hu, H. Cheng, J. M. Lee, Y. Y. Li and J. A. Zapien, *J. Power Sources*, 2014, 261, 184–187.
- [S5] L. Jiang, Y. Qu, Z. Y. Ren, P. Yu, D. D. Zhao, W. Zhou, L. Wang and H. G. Fu, *ACS Appl. Mater. Interfaces*, 2015, 7, 1595–1601.
- [S6] Y. Shi, Z. Zhang, D. Wexler, S. Chou, J. Gao, H. D. Abruna, H. Li, H. Liu, Y. Wu and J. Wang, *J. Power Sources*, 2015, 275, 392–398.
- [S7] C. Niu, M. Huang, P. Wang, J. Meng, X. Liu, X. Wang, K. Zhao, Y. Yu, Y. Wu, C. Lin and L. Mai, *Nano Res.*, 2016, 1, 128–138.
- [S8] J. Leng, H. Mei, L. Zhan, Y. Wang, S. Yang and Y. Song, *Electrochim. Acta*, 2017, 231, 732–738.
- [S9] P. Liu, K. Zhu, Y. Xu, K. Bian, J. Wang, G. Tai, Y. Gao, H. Luo, L. Lu and J. Liu, *Chem. Eur. J.*, 2017, DOI: 10.1002/chem.201700369.
